# Supplementary material for: Polymer Membranes Sonocoated and Electrosprayed with Nano-Hydroxyapatite for Periodontal Tissues Regeneration
Source: PubMed Central journal article supplement (PMC6915502; doi:10.3390/nano9111625), 2019-11-15
Supplement: nanomaterials-09-01625-s001.pdf [file nanomaterials-09-01625-s001.pdf]

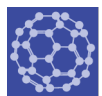1 *Supplementary Materials*

2 **Polymer Membranes Sonocoated and Electrospayed**  
 3 **with Nano-Hydroxyapatite for Periodontal Tissues**  
 4 **Regeneration**

5 **Julia Higuchi** <sup>1,2,3,\*</sup>, **Giuseppino Fortunato** <sup>3\*\*</sup>, **Bartosz Woźniak** <sup>1</sup>, **Agnieszka Chodara** <sup>1,2</sup>, **Sebastian**  
 6 **Domaschke** <sup>4,5</sup>, **Sylwia Męczyńska-Wielgosz** <sup>6</sup>, **Marcin Kruszewski** <sup>7</sup>, **Alex Dommann** <sup>8</sup> and  
 7 **Witold Łojkowski** <sup>1</sup>

8 <sup>1</sup> Laboratory of Nanostructures, Institute of High Pressure Physics, Polish Academy of Sciences, 01142  
 9 Warsaw, Poland; [b.wozniak@labnano.pl](mailto:b.wozniak@labnano.pl); [a.chodara@labnano.pl](mailto:a.chodara@labnano.pl); [w.lojkowski@labnano.pl](mailto:w.lojkowski@labnano.pl)

10 <sup>2</sup> Faculty of Materials Science and Engineering, Warsaw University of Technology, 02507 Warsaw, Poland

11 <sup>3</sup> Laboratory for Biomimetic Membranes and Textiles, Empa Swiss Federal Laboratories for Materials Science  
 12 and Technology, 9014 St. Gallen, Switzerland;

13 <sup>4</sup> Experimental Continuum Mechanics, Empa Swiss Federal Laboratories for Materials Science and  
 14 Technology, 8600 Dübendorf, Switzerland; [sebastian.domaschke@empa.ch](mailto:sebastian.domaschke@empa.ch)

15 <sup>5</sup> Department of Mechanical and Process Engineering, Institute for Mechanical Systems, ETH Zürich, 8092  
 16 Zürich, Switzerland

17 <sup>6</sup> Centre for Radiobiology and Biological Dosimetry, Institute of Nuclear Chemistry and Technology, 03195  
 18 Warsaw, Poland; [sylwia.meczynska@gmail.com](mailto:sylwia.meczynska@gmail.com)

19 <sup>7</sup> Department of Molecular Biology and Translational Research, Institute of Rural Health, 20090 Lublin,  
 20 Poland; [m.kruszewski@ichtj.waw.pl](mailto:m.kruszewski@ichtj.waw.pl)

21 <sup>8</sup> Department Materials meet Life, Empa Swiss Federal Laboratories for Materials Science and Technology,  
 22 9014 St. Gallen, Switzerland; [Alex.Dommann@empa.ch](mailto:Alex.Dommann@empa.ch)

23  
 24 \*Correspondence: [j.higuchi@labnano.pl](mailto:j.higuchi@labnano.pl); Tel.: +48 22 876 0429

25 \*\*Correspondence: [Giuseppino.Fortunato@empa.ch](mailto:Giuseppino.Fortunato@empa.ch); Tel: +41 58 765 7677

26  
 27 **Table S1.** Surface elemental composition (% atomic concentration) determined by XPS

| Sample         | Surface Elemental Composition [%] |       |      |      |
|----------------|-----------------------------------|-------|------|------|
|                | C                                 | O     | Ca   | P    |
| PLGA           | 57,09                             | 42,91 | ---- | ---- |
| PDLLA          | 62,63                             | 37,37 | ---- | ---- |
| PDLLA/PLGA     | 60,91                             | 39,09 | ---- | ---- |
| PLGA/nHA       | 49,46                             | 45,59 | 3,02 | 1,92 |
| PDLLA/nHA      | 43,43                             | 45,89 | 6,45 | 4,22 |
| PDLLA/PLGA/nHA | 47,32                             | 44,45 | 4,91 | 3,32 |

28
